# Supplementary material for: Spatial heterogeneity of &lt;i&gt;Cladonia rangiformis&lt;/i&gt; and &lt;i&gt;Erica&lt;/i&gt; spp. induces variable effects on soil microbial communities which are most robust in bare-soil microhabitats
Source: Copernicus journal article supplement (doi:10.5194/we-22-21-2022), 2022-04-08
Supplement: Supplementary file 1 [file we-22-21-2022-supplement.pdf]

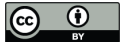

*Supplement of*

**Spatial heterogeneity of *Cladonia rangiformis* and *Erica* spp. induces variable effects on soil microbial communities which are most robust in bare-soil microhabitats**

**Theofilos Dostos et al.**

*Correspondence to:* Efimia M. Papatheodorou (papatheo@bio.auth.gr)

The copyright of individual parts of the supplement might differ from the article licence.

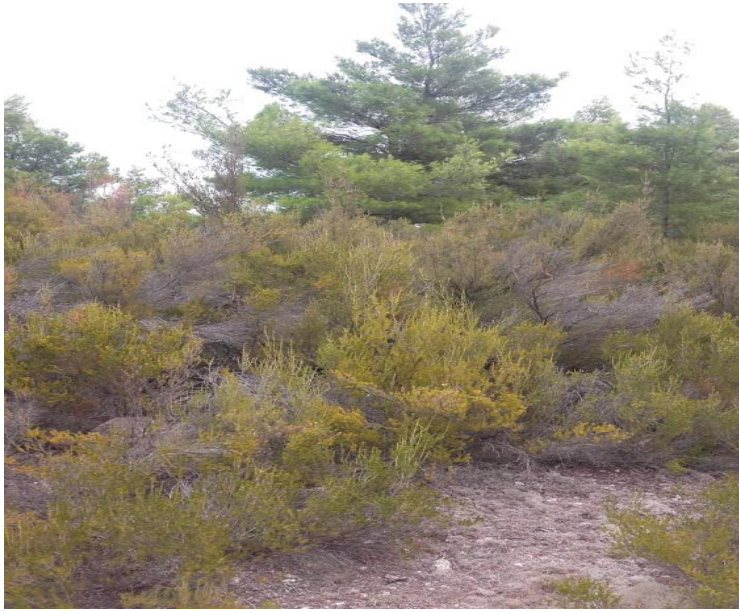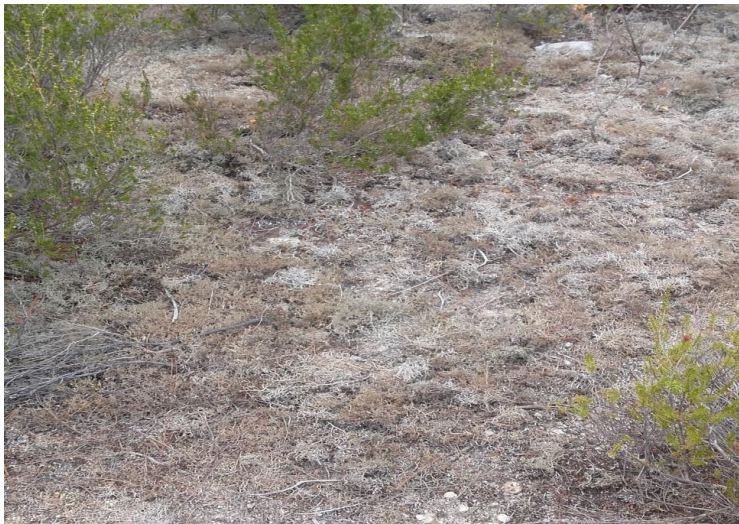

Figure S1. Photographs of the sampling area covered by *Erica* spp. shrubs and biological crust dominated by *C. rangiformis* lichen
